# Supplementary material for: Effect of ultrasonic application during KOH pretreatment and anaerobic process on digestion performance of wheat straw
Source: Royal Society of Chemistry journal article supplement (doi:10.1039/d0ra00525h), 2020-01-01
Supplement: d0ra00525h1.pdf [file d0ra00525h1.pdf]

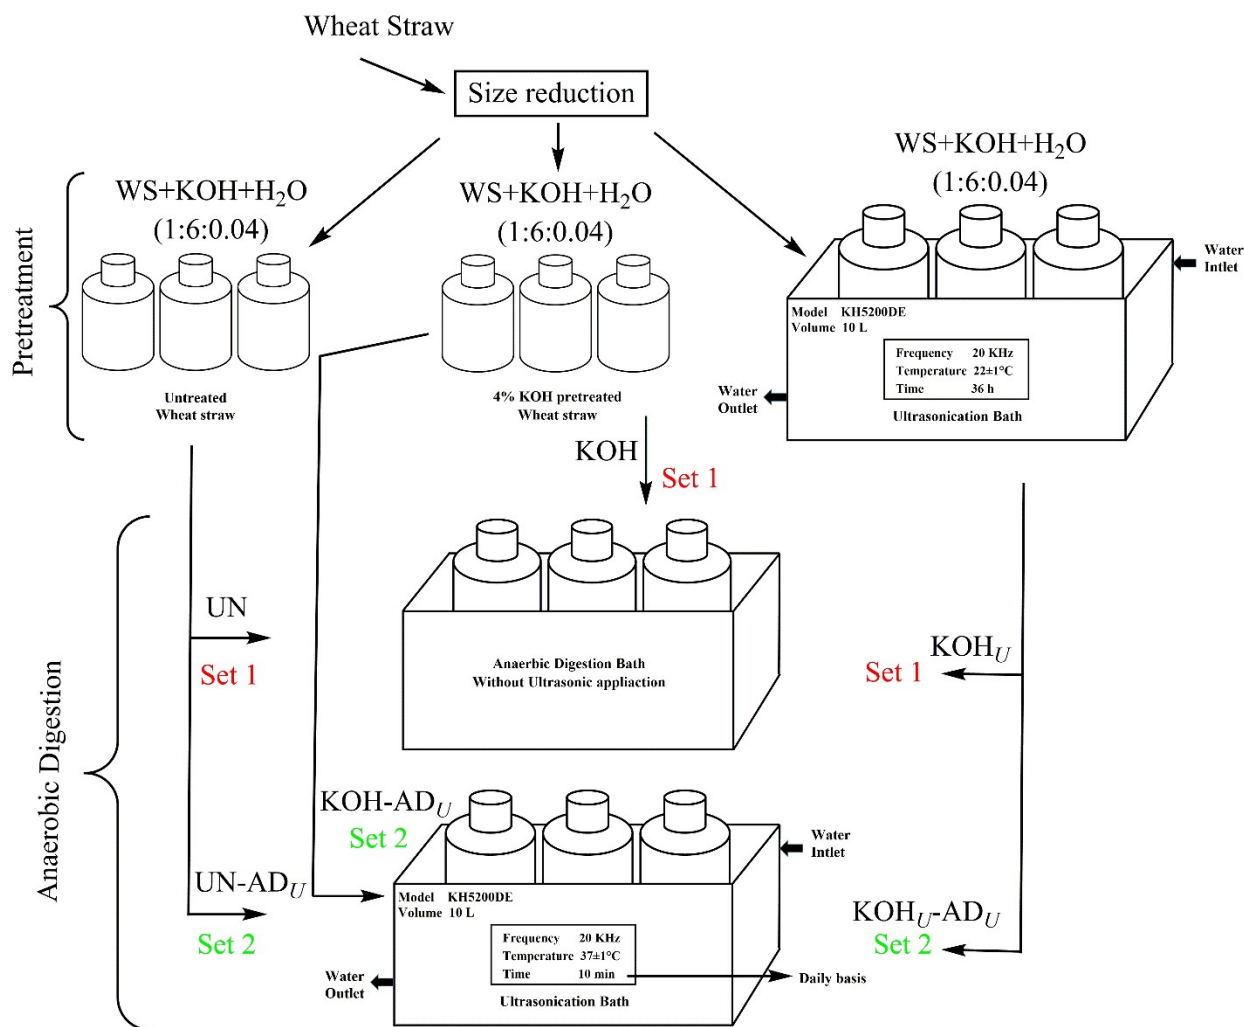

Fig. S1 Experimental design and operating conditions during pretreatment and anaerobic digestion

### Abbreviations

- KOH            single KOH pretreated wheat straw.
- KOH<sub>U</sub>        ultrasonic assisted KOH pretreated wheat straw.
- KOH-AD<sub>U</sub>    single KOH pretreated wheat straw digester for ultrasonic assisted AD.
- UN            untreated wheat straw for AD.
- UN-AD<sub>U</sub>     untreated wheat straw for ultrasonic assisted AD.
- Set 1         Anaerobic digestion (without ultrasonic application).
- Set 2         Ultrasonic assisted anaerobic digestion
